# Supplementary material for: New Scaffolds of Proteasome Inhibitors: Boosting Anticancer Potential by Exploiting the Synergy of In Silico and In Vitro Methodologies
Source: MDPI journal article supplement (doi:10.3390/ph16081096), 2023-08-02
Supplement: s1 [file s1]

## Supplementary Materials

**Table S1.** Score values (ChemPLP scoring function) obtained in noncovalent docking of known proteasome inhibitors in the three active sites. Besides strong proteasome inhibitors, less active compounds (IC<sub>50</sub> values for the CT-L activity with a range from 1800 nM to 32400 nM), were also docked and it was possible to verify that those compounds have lower scores than most active compounds.

| Compound ID   | IC <sub>50</sub> (nM) – CT-L activity | Score values |       |        |
|---------------|---------------------------------------|--------------|-------|--------|
|               |                                       | CT-L         | C-L   | T-L    |
| Ixazomib      | 3.4 [35]                              | 81.93        | 80.10 | 77.85  |
| Delanzomib    | 3.8 [44]                              | 83.73        | 87.30 | 75.48  |
| TMC-95A       | 5.4 [45]                              | 81.34        | 78.62 | 80.85  |
| Carfilzomib   | 6 [34]                                | 100.38       | 95.37 | 100.32 |
| Bortezomib    | 7 [34]                                | 73.55        | 77.85 | 72.94  |
| Fellutamide B | 9.4 [46]                              | 90.77        | 99.26 | 94.37  |
| Oprozomib     | 36 [47]                               | 86.22        | 87.67 | 97.13  |
| MG-132        | 40 [46]                               | 85.34        | 82.59 | 85.45  |
| Epoxomicin    | 47 [48]                               | 80.14        | 92.28 | 73.92  |
| Apigenin      | 1800 [49]                             | 55.12        | 57.73 | 52.65  |
| Quercetin     | 3500 [49]                             | 57.72        | 59.94 | 53.87  |
| Kaempferol    | 10500 [49]                            | 55.81        | 55.67 | 51.53  |
| Cyanidin      | 18400 [50]                            | 51.86        | 54.44 | 52.93  |
| Malvidin      | 32000 [50]                            | 55.05        | 56.09 | 54.44  |
| Delphinidin   | 32400 [50]                            | 49.71        | 55.65 | 56.64  |

**Table S2.** Score values (ChemPLP scoring function, noncovalent docking) of some compounds selected in the SBVS campaign and that were also evaluated in *in vitro* assays.

| Compound ID             | Score values |        |        |
|-------------------------|--------------|--------|--------|
|                         | CT-L         | C-L    | T-L    |
| NSC55467 (compound 1)   | 76.87        | 72.79  | 70.95  |
| NSC115290 (compound 2)  | 79.26        | 79.10  | 66.89  |
| NSC728499 (compound 3)  | 76.66        | 79.69  | 79.13  |
| JHG58 (compound 4)      | 69.24        | 61.47  | 67.82  |
| Cobicistat (compound 5) | 112.53       | 106.19 | 109.13 |

**Table S3.** Inhibitory potential of the compounds in isolated 20S proteasomes. The results are expressed as percentage of proteasome inhibition of the CT-L/C-L/T-L activity at 10  $\mu$ M and 100  $\mu$ M. Data presented are mean triplicate value  $\pm$  SD of at least three independent experiments. Statistical analysis was carried out using one-way ANOVA with Dunnett's multiple comparisons test, where ns =  $p > 0.05$ , \* $p < 0.05$ , \*\* $p < 0.01$ , \*\*\* $p < 0.001$ , \*\*\*\* $p < 0.0001$  relative to control. ns = not significant.

| Percentage of proteasome inhibition ± SD – Isolated 20S proteasome |       |      |          |        |       |          |       |      |          |        |      |          |       |      |          |        |      |          |
|--------------------------------------------------------------------|-------|------|----------|--------|-------|----------|-------|------|----------|--------|------|----------|-------|------|----------|--------|------|----------|
| Compound ID                                                        | CT-L  |      |          |        |       |          | C-L   |      |          |        |      |          | T-L   |      |          |        |      |          |
|                                                                    | 10 μM |      |          | 100 μM |       |          | 10 μM |      |          | 100 μM |      |          | 10 μM |      |          | 100 μM |      |          |
|                                                                    | %     | SD   | <i>p</i> | %      | SD    | <i>p</i> | %     | SD   | <i>p</i> | %      | SD   | <i>p</i> | %     | SD   | <i>p</i> | %      | SD   | <i>p</i> |
| 1                                                                  | 0     | 0    | ns       | 37.72  | 14.01 | ****     | 0     | 0    | ns       | 54.47  | 6.73 | ****     | 4.43  | 4.39 | ns       | 51.65  | 8.35 | ****     |
| 2                                                                  | 81.30 | 4.85 | ****     | 98.00  | 1.21  | ****     | 90.77 | 8.16 | ****     | 97.86  | 0.72 | ****     | 0     | 0    | ns       | 97.00  | 1.72 | ****     |
| 3                                                                  | 8.20  | 5.53 | **       | 91.40  | 3.57  | ****     | 9.90  | 3.83 | ***      | 88.38  | 7.02 | ****     | 8.80  | 4.28 | ****     | 95.30  | 3.24 | ****     |
| 4                                                                  | 3.30  | 2.28 | ns       | 69.90  | 9.61  | ****     | 5.80  | 3.66 | ns       | 77.65  | 5.17 | ****     | 0     | 0    | ns       | 73.95  | 6.96 | ****     |
| 5                                                                  | 2.85  | 1.08 | ns       | 35.60  | 3.95  | ****     | 0     | 0    | ns       | 33.57  | 4.09 | ****     | 5.37  | 3.81 | *        | 5.35   | 2.06 | ns       |
| Bortezomib                                                         | 90.95 | 0.45 | ****     | 99.92  | 0.10  | ****     | 33.80 | 4.25 | ****     | 92.80  | 2.23 | ****     | 3.20  | 2.06 | ns       | 33.58  | 3.17 | ****     |

**Table S4.** Inhibitory potential of the compounds in lysates of Jurkat cells. The results are expressed as percentage of proteasome inhibition of the CT-L/C-L/T-L activity at 10  $\mu$ M and 100  $\mu$ M. Data presented are mean triplicate value  $\pm$  SD of at least three independent experiments. Statistical analysis was carried out using one-way ANOVA with Dunnett's multiple comparisons test, where ns =  $p > 0.05$ , \*\* $p < 0.01$ , \*\*\* $p < 0.001$ , \*\*\*\* $p < 0.0001$  relative to control. ns = not significant.

| Percentage of proteasome inhibition ± SD – Cell lysates (Jurkat) |       |      |          |        |      |          |       |      |          |        |      |          |       |      |          |        |      |          |
|------------------------------------------------------------------|-------|------|----------|--------|------|----------|-------|------|----------|--------|------|----------|-------|------|----------|--------|------|----------|
| Compound ID                                                      | CT-L  |      |          |        |      |          | C-L   |      |          |        |      |          | T-L   |      |          |        |      |          |
|                                                                  | 10 μM |      |          | 100 μM |      |          | 10 μM |      |          | 100 μM |      |          | 10 μM |      |          | 100 μM |      |          |
|                                                                  | %     | SD   | <i>p</i> | %      | SD   | <i>p</i> | %     | SD   | <i>p</i> | %      | SD   | <i>p</i> | %     | SD   | <i>p</i> | %      | SD   | <i>p</i> |
| 1                                                                | 0     | 0    | ns       | 53.47  | 2.53 | ****     | 2.27  | 0.94 | **       | 19.43  | 2.53 | ****     | 0     | 0    | ns       | 16.00  | 3.87 | ****     |
| 2                                                                | 8.23  | 1.07 | ****     | 72.11  | 1.84 | ****     | 26.87 | 1.21 | ****     | 73.45  | 2.04 | ****     | 7.15  | 1.92 | ****     | 56.17  | 2.13 | ****     |
| 3                                                                | 0     | 0    | ns       | 32.80  | 2.21 | ****     | 0     | 0    | ns       | 25.42  | 2.50 | ****     | 0     | 0    | ns       | 33.04  | 2.94 | ****     |
| 4                                                                | 10.49 | 2.41 | ****     | 98.00  | 0.20 | ****     | 8.16  | 1.90 | ****     | 98.94  | 0.22 | ****     | 0     | 0    | ns       | 0      | 0    | ns       |
| 5                                                                | 0     | 0    | ns       | 63.73  | 1.42 | ****     | 0     | 0    | ns       | 36.16  | 1.75 | ****     | 0     | 0    | ns       | 0      | 0    | ns       |
| Bortezomib                                                       | 99.63 | 0.55 | ****     | 99.30  | 0.61 | ****     | 92.00 | 0.90 | ****     | 94.22  | 0.99 | ****     | 32.04 | 2.16 | ****     | 40.55  | 2.38 | ****     |

**Table S5.** Inhibitory potential of the compounds in lysates of K562 cells. The results are expressed as percentage of proteasome inhibition of the CT-L/C-L/T-L activity at 10  $\mu$ M and 100  $\mu$ M. Data presented are mean triplicate value  $\pm$  SD of at least three independent experiments. Statistical analysis was carried out using one-way ANOVA with Dunnett's multiple comparisons test, where ns =  $p > 0.05$ , \*\*\*\* $p < 0.0001$  relative to control. ns = not significant.

| Percentage of proteasome inhibition ± SD – Cell lysates (K562) |       |      |          |        |      |          |       |      |          |        |      |          |       |      |          |        |      |          |
|----------------------------------------------------------------|-------|------|----------|--------|------|----------|-------|------|----------|--------|------|----------|-------|------|----------|--------|------|----------|
| Compound ID                                                    | CT-L  |      |          |        |      |          | C-L   |      |          |        |      |          | T-L   |      |          |        |      |          |
|                                                                | 10 μM |      |          | 100 μM |      |          | 10 μM |      |          | 100 μM |      |          | 10 μM |      |          | 100 μM |      |          |
|                                                                | %     | SD   | <i>p</i> | %      | SD   | <i>p</i> | %     | SD   | <i>p</i> | %      | SD   | <i>p</i> | %     | SD   | <i>p</i> | %      | SD   | <i>p</i> |
| 1                                                              | 0     | 0    | ns       | 62.74  | 2.50 | ****     | 0     | 0    | ns       | 28.18  | 3.07 | ****     | 0     | 0    | ns       | 4.06   | 2.03 | ns       |
| 2                                                              | 13.15 | 2.95 | ****     | 40.15  | 1.97 | ****     | 0     | 0    | ns       | 63.20  | 1.87 | ****     | 5.12  | 1.04 | ****     | 42.15  | 1.90 | ****     |
| 3                                                              | 9.34  | 1.66 | ****     | 59.13  | 1.94 | ****     | 14.16 | 2.10 | ****     | 38.81  | 2.35 | ****     | 0     | 0    | ns       | 12.22  | 2.11 | ***      |
| Bortezomib                                                     | 95.17 | 1.12 | ****     | 99.60  | 0.61 | ****     | 94.99 | 0.86 | ****     | 97.19  | 0.95 | ****     | 36.08 | 1.76 | ****     | 45.45  | 2.42 | ****     |

**Table S6.** Inhibitory potential of the compounds in lysates of HT-29 cells. The results are expressed as percentage of proteasome inhibition of the CT-L/C-L/T-L activity at 10  $\mu$ M and 100  $\mu$ M. Data presented are mean triplicate value  $\pm$  SD of at least three independent experiments. Statistical analysis was carried out using one-way ANOVA with Dunnett's multiple comparisons test, where ns =  $p > 0.05$ , \* $p < 0.05$ , \*\* $p < 0.01$ , \*\*\* $p < 0.0001$  relative to control. ns = not significant.

| Percentage of proteasome inhibition ± SD – Cell lysates (HT-29) |       |      |          |        |      |          |       |      |          |        |      |          |       |      |          |        |      |          |
|-----------------------------------------------------------------|-------|------|----------|--------|------|----------|-------|------|----------|--------|------|----------|-------|------|----------|--------|------|----------|
| Compound ID                                                     | CT-L  |      |          |        |      |          | C-L   |      |          |        |      |          | T-L   |      |          |        |      |          |
|                                                                 | 10 μM |      |          | 100 μM |      |          | 10 μM |      |          | 100 μM |      |          | 10 μM |      |          | 100 μM |      |          |
|                                                                 | %     | SD   | <i>p</i> | %      | SD   | <i>p</i> | %     | SD   | <i>p</i> | %      | SD   | <i>p</i> | %     | SD   | <i>p</i> | %      | SD   | <i>p</i> |
| 1                                                               | 0     | 0    | ns       | 62.12  | 2.93 | ****     | 0     | 0    | ns       | 76.03  | 2.76 | ****     | 0     | 0    | ns       | 5.14   | 1.94 | *        |
| 2                                                               | 2.11  | 0.94 | ns       | 62.16  | 1.92 | ****     | 6.78  | 2.32 | ****     | 69.25  | 2.04 | ****     | 0     | 0    | ns       | 52.24  | 2.10 | ****     |
| 3                                                               | 0     | 0    | ns       | 31.37  | 1.90 | ****     | 0     | 0    | ns       | 18.64  | 2.43 | ****     | 0     | 0    | ns       | 38.92  | 2.68 | ****     |
| 4                                                               | 10.10 | 1.95 | ****     | 97.93  | 0.24 | ****     | 0     | 0    | ns       | 82.12  | 0.93 | ****     | 0     | 0    | ns       | 0      | 0    | ns       |
| 5                                                               | 0     | 0    | ns       | 81.18  | 1.81 | ****     | 0     | 0    | ns       | 29.29  | 2.74 | ****     | 0     | 0    | ns       | 10.02  | 2.30 | ****     |
| Bortezomib                                                      | 97.99 | 0.39 | ****     | 99.37  | 0.40 | ****     | 92.93 | 1.67 | ****     | 99.05  | 0.13 | ****     | 50.94 | 2.55 | ****     | 65.97  | 3.52 | ****     |

**Table S7.** Inhibitory potential of the compounds in lysates of HCT-116 cells. The results are expressed as percentage of proteasome inhibition of the CT-L/C-L/T-L activity at 10  $\mu$ M and 100  $\mu$ M. Data presented are mean triplicate value  $\pm$  SD of at least three independent experiments. Statistical analysis was carried out using one-way ANOVA with Dunnett's multiple comparisons test, where ns =  $p > 0.05$ , \* $p < 0.05$ , \*\* $p < 0.01$ , \*\*\* $p < 0.001$ , \*\*\*\* $p < 0.0001$  relative to control. ns = not significant.

| Percentage of proteasome inhibition ± SD – Cell lysates (HCT-116) |       |      |          |        |      |          |       |      |          |        |      |          |       |      |          |        |      |          |
|-------------------------------------------------------------------|-------|------|----------|--------|------|----------|-------|------|----------|--------|------|----------|-------|------|----------|--------|------|----------|
| Compound ID                                                       | CT-L  |      |          |        |      |          | C-L   |      |          |        |      |          | T-L   |      |          |        |      |          |
|                                                                   | 10 μM |      |          | 100 μM |      |          | 10 μM |      |          | 100 μM |      |          | 10 μM |      |          | 100 μM |      |          |
|                                                                   | %     | SD   | <i>p</i> | %      | SD   | <i>p</i> | %     | SD   | <i>p</i> | %      | SD   | <i>p</i> | %     | SD   | <i>p</i> | %      | SD   | <i>p</i> |
| 1                                                                 | 0     | 0    | ns       | 90.18  | 1.90 | ****     | 0     | 0    | ns       | 71.23  | 3.10 | ****     | 0     | 0    | ns       | 0      | 0    | ns       |
| 2                                                                 | 6.93  | 2.67 | ***      | 74.20  | 3.06 | ****     | 11.14 | 2.95 | ****     | 74.08  | 3.77 | ****     | 0     | 0    | ns       | 44.11  | 3.10 | ****     |
| 3                                                                 | 0     | 0    | ns       | 33.01  | 2.88 | ****     | 0     | 0    | ns       | 0      | 0    | ns       | 0     | 0    | ns       | 8.10   | 1.97 | ****     |
| 4                                                                 | 22.07 | 2.25 | ****     | 97.99  | 0.42 | ****     | 69.20 | 2.15 | ****     | 90.08  | 2.73 | ****     | 0     | 0    | ns       | 0      | 0    | ns       |
| 5                                                                 | 0     | 0    | ns       | 66.87  | 2.75 | ****     | 0     | 0    | ns       | 28.15  | 1.54 | ****     | 0     | 0    | ns       | 0      | 0    | ns       |
| Bortezomib                                                        | 97.94 | 0.57 | ****     | 99.14  | 0.15 | ****     | 94.21 | 1.97 | ****     | 99.00  | 0.53 | ****     | 26.18 | 2.84 | ****     | 45.05  | 2.91 | ****     |

**Table S8.** Percentage of cell viability at 10  $\mu$ M and 100  $\mu$ M in Jurkat/HT-29/HCT-116 cell line. The results are expressed as percentage of cell viability at 10  $\mu$ M and 100  $\mu$ M. Cell viability in control samples was arbitrarily set as 100% and its levels in the tested compounds and/or BTZ-treated samples were plotted as percentage of this value. Data presented are mean triplicate value  $\pm$  SD of at least three independent experiments. Statistical analysis was carried out using one-way ANOVA with Dunnett's multiple comparisons test, where ns =  $p > 0.05$ , \*\* $p < 0.01$ , \*\*\* $p < 0.001$ , \*\*\*\* $p < 0.0001$  relative to control. ns = not significant.

[illegible]



**Table S9.** Percentage of cell viability at 10  $\mu$ M and 100  $\mu$ M in K562 cell line. The results are expressed as percentage of cell viability at 10  $\mu$ M and 100  $\mu$ M. Cell viability in control samples was arbitrarily set as 100% and its levels in the tested compounds and/or BTZ-treated samples were plotted as percentage of this value. Data presented are mean triplicate value  $\pm$  SD of at least three independent experiments. Statistical analysis was carried out using one-way ANOVA with Dunnett's multiple comparisons test, where ns =  $p > 0.05$ , \*\* $p < 0.01$ , \*\*\* $p < 0.001$ , \*\*\*\* $p < 0.0001$  relative to control. ns = not significant.

| Compound ID | Percentage of cell viability $\pm$ SD – K562 |      |          |             |      |          |
|-------------|----------------------------------------------|------|----------|-------------|------|----------|
|             | 10 $\mu$ M                                   |      |          | 100 $\mu$ M |      |          |
|             | %                                            | SD   | <i>p</i> | %           | SD   | <i>p</i> |
| 1           | 93.12                                        | 2.15 | **       | 18.23       | 3.26 | ****     |
| 2           | 86.30                                        | 3.61 | ****     | 86.52       | 4.19 | ***      |
| 3           | 100                                          | 0    | ns       | 100         | 0    | ns       |
| Bortezomib  | 0                                            | 0    | ****     | 0           | 0    | ****     |

**Figure S1.**  $^1\text{H}$  NMR (300 MHz,  $\text{CDCl}_3$ ) of compound 4 (JHG58).

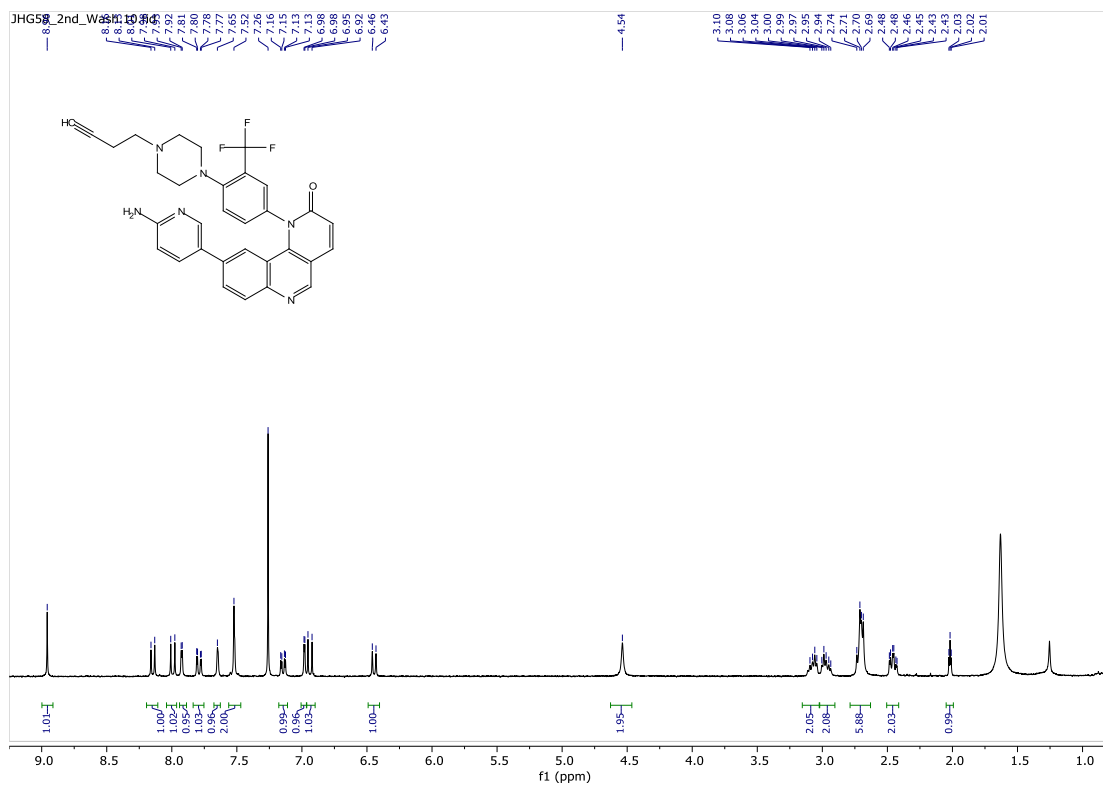

**Figure S2.** HRMS (ESI) of compound 4 (JHG58).

Sample Name JHG58 Instrument impact II 1825265.10036  
Comment

**Acquisition Parameter**

|             |          |                      |          |                  |           |
|-------------|----------|----------------------|----------|------------------|-----------|
| Source Type | ESI      | Ion Polarity         | Positive | Set Nebulizer    | 2.8 Bar   |
| Focus       | Active   | Set Capillary        | 4500 V   | Set Dry Heater   | 200 °C    |
| Scan Begin  | 100 m/z  | Set End Plate Offset | -500 V   | Set Dry Gas      | 8.0 l/min |
| Scan End    | 1350 m/z | Set Charging Voltage | 2000 V   | Set Divert Valve | Waste     |
|             |          | Set Corona           | 0 nA     | Set APCI Heater  | 0 °C      |

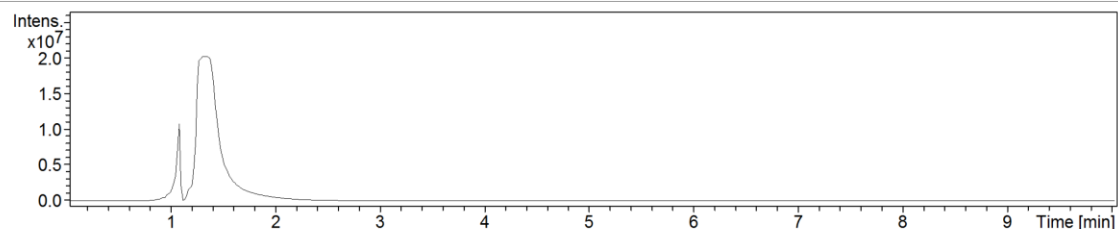

**+MS, 1.3min #76**

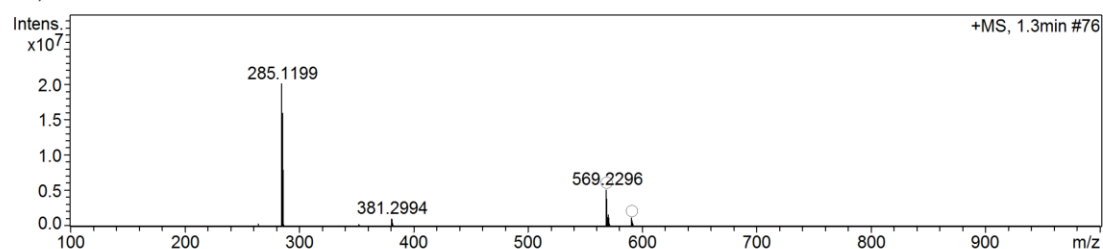

| Meas. m/z | # | Ion Formula                                                       | m/z      | err [ppm] | mSigma | # mSigma | Score  | rdb  | e <sup>-</sup> Conf | N-Rule |
|-----------|---|-------------------------------------------------------------------|----------|-----------|--------|----------|--------|------|---------------------|--------|
| 569.2296  | 1 | C <sub>32</sub> H <sub>28</sub> F <sub>3</sub> N <sub>6</sub> O   | 569.2271 | -4.3      | 25.2   | 1        | 100.00 | 21.0 | even                | ok     |
| 591.2109  | 1 | C <sub>32</sub> H <sub>27</sub> F <sub>3</sub> N <sub>6</sub> NaO | 591.2091 | -3.0      | 6.4    | 1        | 100.00 | 21.0 | even                | ok     |
